# Supplementary material
Source: PubMed Central journal article supplement (PMC7378870)
Supplement: jamaoncol-e201808-s001.pdf [file jamaoncol-e201808-s001.pdf]

1 Trial protocol

2

3 **A Multicenter Randomized Controlled Trial Comparing Chemotherapy plus**  
4 **Locoregional Radiotherapy with Chemotherapy Alone for Primary Metastatic**  
5 **Nasopharyngeal Carcinoma**

6

7

FINAL PROTOCOL

8

Version: 2014/3/20

9 Principal Investigator: Dr. Ming-Yuan Chen

10 Sponsor: Sun Yat-sen University Cancer Center

11 Collaborators:

12 Guangdong Provincial People's Hospital

13 Study coordinator: Dr. Hong-Dan Zhang

14 The First Affiliated Hospital, Sun Yat-sen University

15 Study coordinator: Dr. Bi-Xiu Wen

16

17

18

## **Contents**

|    |                                           |
|----|-------------------------------------------|
| 19 |                                           |
| 20 | SCHEMA                                    |
| 21 | 1.0 Background                            |
| 22 | 2.0 Objectives                            |
| 23 | 3.0 Subject Enrollment                    |
| 24 | 4.0 Treatment Plan                        |
| 25 | 5.0 Observation and Assessment            |
| 26 | 6.0 Follow-Up and Recording of Events     |
| 27 | 7.0 Security Measures and Quality Control |
| 28 | 8.0 Statistical Analysis                  |
| 29 | 9.0 Ethical Considerations                |
| 30 | 10.0 References                           |
| 31 | Appendix I                                |
| 32 | Appendix II                               |



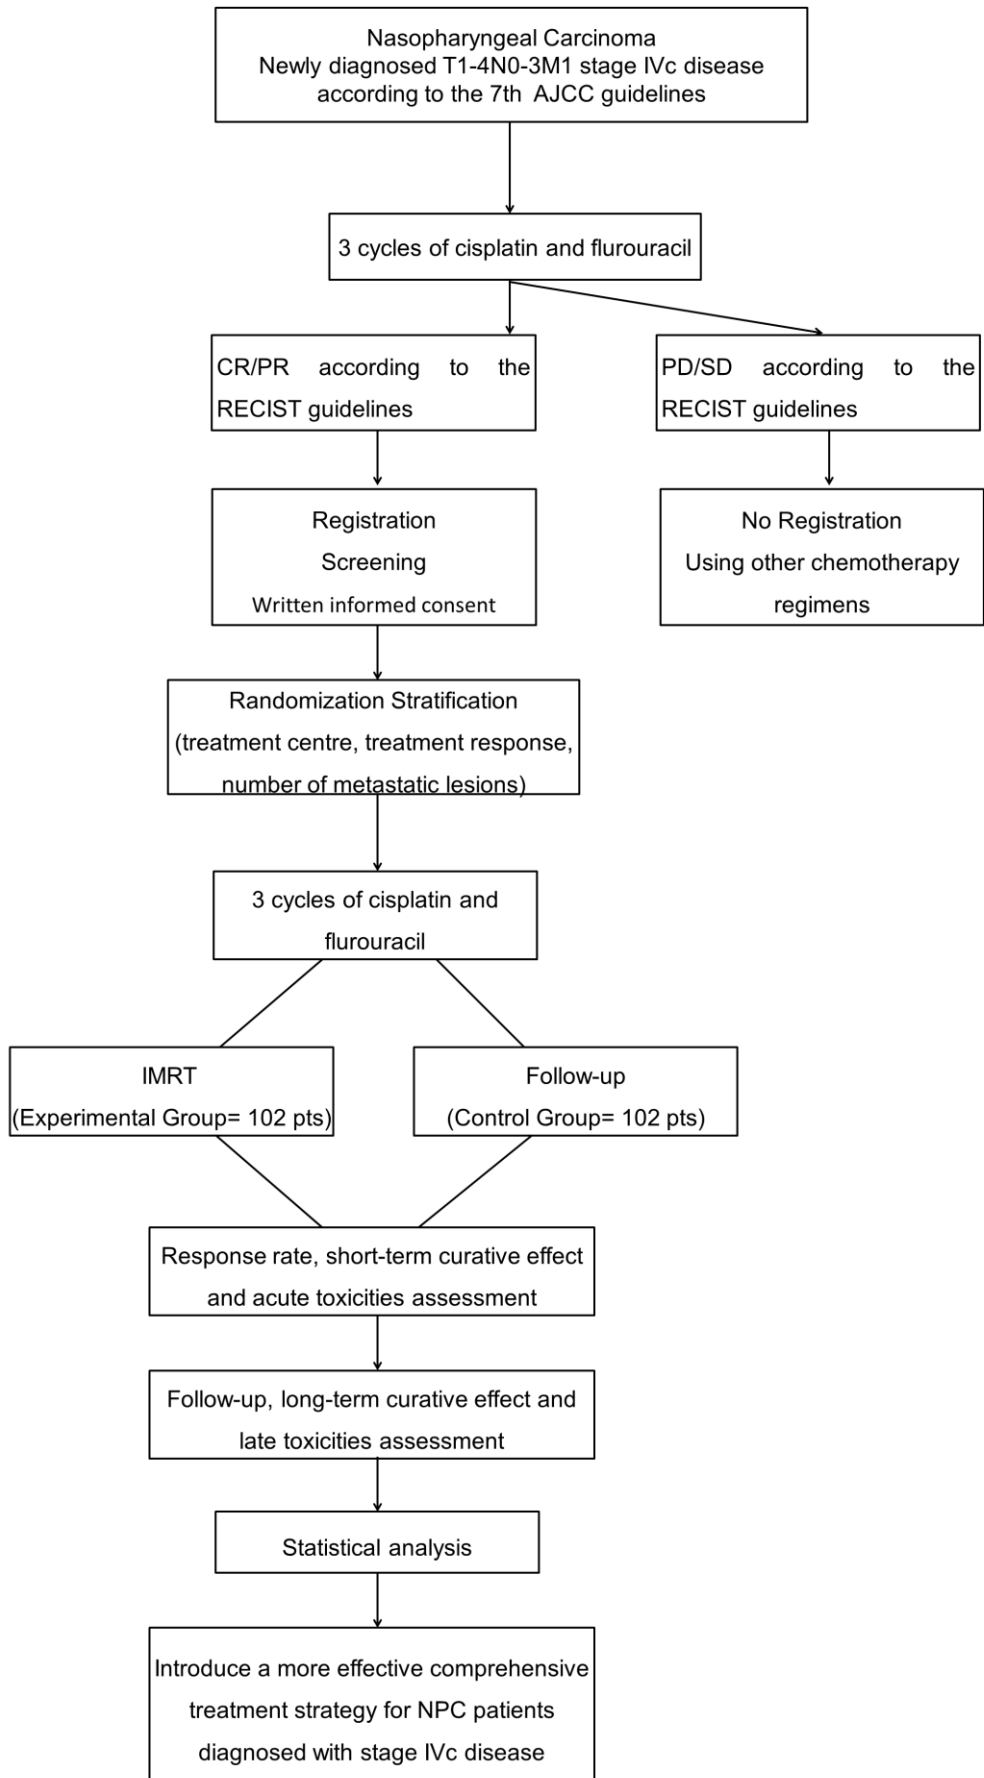

## 35 **1.0 Background**

36 Nasopharyngeal carcinoma (NPC) is one of the most common malignant tumors in  
37 China and has the highest incidence rate in South China and Hong Kong. The  
38 incidence exceeds 20/100,000 people worldwide. According to the GLOBOCAN  
39 2008 data published by the International Cancer Institute, there were 33,101 newly  
40 diagnosed NPC patients and 20,899 deaths related to NPC in China in 2008,  
41 accounting for 40% of newly diagnosed NPC patients worldwide. Among other  
42 malignant tumors, NPC has an incidence rate that ranks 10<sup>th</sup> and a mortality rate that  
43 ranks 9<sup>th</sup> in China. The age of onset for NPC is approximately 40 to 50 years, and this  
44 disease has major impacts on society, the economy, and family members, and NPC  
45 also affects the ability to work. Radiation therapy is the main treatment for NPC. The  
46 5-year overall survival (OS) rate of early-stage patients treated with  
47 intensity-modulated radiotherapy (IMRT) alone is over 90% (1). For advanced  
48 locoregional NPC patients without distant metastasis treated with radiotherapy (RT)  
49 and chemotherapy, the 5-year OS rate can reach 68-74.5% (2-3). Although NPC is a  
50 special type of head and neck squamous cell carcinoma (HNSCC), NPC differs from  
51 other HNSCCs in terms of epidemiology, pathology, clinical manifestations and  
52 treatment response, and NPC is the most invasive and most likely to metastasize of all  
53 HNSCCs. Approximately 6-10% of patients with NPC were diagnosed with distant  
54 metastases at the initial visit (4-6). Metastatic NPC (mNPC) is considered to be  
55 incurable, and palliative systemic chemotherapy is the primary treatment; these  
56 patients have a median OS of only 10-15 months (7). Therefore, exploring a  
57 comprehensive treatment model to improve the survival time of mNPC has become a  
58 hot topic for current research.

59 In the past, active primary tumor treatment for epithelial cancer with distant

60 dissemination was not considered beneficial for patient survival and was not routinely  
61 used. Furthermore, studies have shown that surgically excising primary tumors may  
62 interrupt the dormancy of micrometastases, thereby accelerating the progression of  
63 metastases (8). However, there is increasing evidence that radical surgical resection or  
64 RT for primary tumors can significantly improve OS in patients with distant  
65 metastases. In 2001, the New England Journal of Medicine and The Lancet published  
66 two prospective studies that evaluated the value of nephrectomy in distant metastatic  
67 renal-cell carcinoma. Both studies found that radical nephrectomy combined with  
68 postoperative interferon alpha-2b systemic drug therapy could significantly prolong  
69 the median survival time of patients compared with interferon alpha-2b therapy alone.  
70 The median survival time increased from 8.1 to 11.1 months and from 7 months to 17  
71 months, with P values of 0.05 and 0.03, respectively (9-10). In addition, the  
72 combination treatment regimen was associated with a longer disease-free survival  
73 time than with interferon alpha-2b therapy alone (from 3 months to 5 months, P =  
74 0.04) (10). To date, only two prospective studies have evaluated the role of  
75 locoregional treatment in patients with distant metastatic cancer. Elisabetta Rapiti and  
76 colleagues evaluated 300 patients with newly diagnosed metastatic breast cancer and  
77 found that patients who underwent radical mastectomy with negative margins had a  
78 40% reduction in the risk of death compared with those who did not undergo surgery  
79 (P=0.049). Interestingly, the study also found that patients who underwent radical  
80 mastectomy but had positive margins did not experience this survival benefit (11),  
81 suggesting that completely removing the primary lesion is beneficial for the survival  
82 outcomes of newly diagnosed patients with metastatic breast cancer. Ruiterkamp  
83 conducted a meta-analysis of 10 retrospective studies that investigated local surgical  
84 treatment for metastatic breast cancer and found a combined-effects hazard ratio (HR)

85 of 0.65 (95% CI, 0.59-0.72) (12). Similarly, studies have shown that RT for primary  
86 lesions is also beneficial for the survival outcomes of metastatic breast cancer patients.  
87 Several retrospective studies have also found that radical prostatectomy or local RT to  
88 prostate lesions is also beneficial in prolonging the survival time of patients with  
89 distant metastases (14-18).

90 As early as January 1889, Stephen Paget first proposed and interpreted the "seed and  
91 soil" hypothesis of tumor metastasis. He believed that the distant organs are either not  
92 completely passive or that they have no choice but to develop metastatic lesions. Now,  
93 120 years later, Paget's theory has been extended to the fact that radical treatment for  
94 primary tumors can interfere with the "soil" in addition to killing the "seeds", thus  
95 improving the survival outcomes of patients with distant metastases. In August 2011,  
96 Nature Review Clinical Oncology published a review article by Scott C. Morgan and  
97 Chris C. Parker, which systematically reviewed the role of local treatment on primary  
98 tumors and boldly speculated that local radical treatment can block the progression of  
99 distant metastatic lesions and prolong the OS time of patients with distant metastases.  
100 The article also advocates for a prospective study similar to the aforementioned  
101 clinical trials for kidney cancer, with OS as the primary end point (19).

102 According to the NCCN guidelines (version 2.2011), platinum-based systemic  
103 chemotherapy is the main treatment for mNPC. RT is only suitable for  
104 nasopharyngeal tumors and regional metastatic lymph nodes to control local  
105 symptoms, such as headaches or nosebleeds, or for a small number of patients with  
106 isolated metastatic lesions or small lesions (20-21). However, a recent case report  
107 indicated that a small number of patients who received systemic cisplatin-based  
108 chemotherapy and local high-dose RT could achieve tumor-free survival between 29  
109 and 91 months (22). Another report retrospectively analyzed 105 mNPC patients who

110 received more than 30 Gy of locoregional RT. Of these patients, 96 patients (91%)  
111 received systemic chemotherapy, and 71 patients (68%) received more than 65 Gy of  
112 primary RT. The median OS time was 25 months, and the 2- and 5-year OS rates were  
113 50% and 17%, respectively (23), which were significantly higher than the previously  
114 reported 2- and 3-year OS rates of 35% and 18% (24). Further univariable analysis  
115 also showed that patients who received more than 65 Gy during primary RT had a  
116 median OS time of 27 months, which was significantly longer than that of patients  
117 who received less than 65 Gy of locoregional RT (median survival: 12 months,  $P$   
118  $=0.05$ ) (23). However, these results were based on retrospective studies, and the  
119 evidence was still not convincing. For example, the finding that patients who received  
120 comprehensive therapy had better prognoses than those who did not receive  
121 comprehensive therapy might be attributed to the patient selection bias. Therefore, the  
122 value of locoregional RT for mNPC need to be further validated in rigorous  
123 prospective clinical trials.

124 Previous studies have shown that the number of chemotherapy cycles is also an  
125 independent prognostic factor. The 3-year OS rate of patients who received more than  
126 6 cycles of chemotherapy is significantly higher than those who received fewer than 6  
127 cycles of chemotherapy (32% vs. 14.0%,  $P < 0.001$ ) (24). However, several studies  
128 have shown that there is no correlation between the number of chemotherapy cycles  
129 and survival outcomes in patients who received locoregional RT. Lin Shaojun and  
130 colleagues showed that patients treated with more than 4 cycles of chemotherapy had  
131 a median OS time of 26 months, and those who received fewer than 4 cycles had a  
132 median survival time of 22 months ( $P=0.16$ ). However, additional studies showed that  
133 induction chemotherapy was an independent prognostic factor in patients treated with  
134 comprehensive treatment, and the risk of death for patients who received induction



135 chemotherapy was significantly lower than that for patients who did not receive  
136 induction chemotherapy (HR, 0.5; P = 0.007) (25). These findings suggest that  
137 induction chemotherapy might help improve survival for mNPC patients, but the  
138 survival outcomes might not be further improved with excessive cycles of systemic  
139 chemotherapy (>6).

140 In addition to the number of chemotherapy cycles, the dose of locoregional RT is also  
141 closely related to the OS of mNPC patients. As systemic chemotherapy is the main  
142 treatment for mNPC patients and locoregional RT is often used to control the  
143 symptoms of primary tumors, radical doses of locoregional RT are rarely used.  
144 Approximately 18.2-30.8% of patients were only treated with less than 66 Gy of  
145 locoregional RT (23,25). Lin Shaojun and colleagues reported that the median OS  
146 time of patients who received more than 65 Gy of radical RT was 27 months, which is  
147 significantly longer than that of patients who received less than 65 Gy of RT (median  
148 OS time: 12 months, P=0.05) (23). Our study also showed that in patients who  
149 received combined locoregional RT and systemic chemotherapy (n=176), radical  
150 locoregional RT ( $\geq 66$  Gy) was associated with favorable survival outcomes (median  
151 survival time: 51.0 vs. 23.3, P=0.001). Moreover, according to the multivariable Cox  
152 model, more than 66Gy of radical RT is an independent prognostic factor (HR, 0.4, P  
153 = 0.001) (25). Therefore, according to the previous findings, moderate induction  
154 chemotherapy (approximately 6 cycles) and radical locoregional RT ( $\geq 66$  Gy) should  
155 lead to significant survival benefits for mNPC patients.

156 Therefore, we designed this open-label multicenter randomized controlled clinical  
157 trial to compare the efficacy, therapeutic toxicity, and resulting quality of life of  
158 induction chemotherapy combined with radically dosed primary RT with those of  
159 systemic chemotherapy alone for the treatment of chemotherapy-sensitive mNPC

160 patients. The difference between therapies is intended to clearly answer the following  
161 clinical scientific question that currently needs to be addressed: "Can primary radical  
162 RT extend the survival time of NPC patients with distant metastasis?"

## 163 **2.0 Objectives**

### 164 **2.1 The Primary Objectives**

165 To evaluate and compare the short-term and long-term effects on OS between the  
166 chemotherapy plus RT group and chemotherapy alone group in  
167 chemotherapy-sensitive mNPC patients

### 168 **2.2 The Secondary Objectives**

169 To evaluate the tumor remission rates and progression-free survival between the  
170 chemotherapy plus RT group and the chemotherapy alone group in  
171 chemotherapy-sensitive mNPC patients and to evaluate and compare the acute  
172 toxicities including oral mucosa, dermatologic, hematologic, hepatic, and renal  
173 toxicities and long-term toxicities including neurotoxicity, ototoxicity, radiation  
174 damage, etc. between the chemotherapy plus RT group and the chemotherapy  
175 alone group in chemotherapy-sensitive mNPC patients.

## 176 **3.0 Subject Enrollment**

### 177 **3.1 Eligibility Criteria**

- 178 a. Histologically confirmed NPC
- 179 b. Clinically staged as T1-4N0-3M1, stage IVc at diagnosis (according to the 7<sup>th</sup>  
180 AJCC edition)
- 181 c. No previous systemic chemotherapy
- 182 d. Age between 18-65 years
- 183 e. Adequate organ function (white blood cell count of at least  $4.0 \times 10^9$  per L;  
184 absolute neutrophil of at least  $2.0 \times 10^9$  per L; hemoglobin concentrations of at

- 185 least 90 g/L; platelet cell count of at least  $100 \times 10^9$  per L; aspartate  
186 transaminase and alanine transaminase levels less than 2.5 times the upper  
187 normal limit; and creatinine clearance rate at least 60 mL/min)
- 188 f. Satisfactory performance status: Karnofsky scale (KPS) $\geq 70$
- 189 g. Achieve a partial response (PR)/complete response (CR) after 3 cycles of  
190 chemotherapy
- 191 h. Properly informed about the investigational nature of this study and give  
192 written informed consent.

### 193 **3.2 Exclusion Criteria**

- 194 a. Recurrent metastatic nasopharyngeal carcinoma, which developed distant  
195 metastases after primary treatment.
- 196 b. Age  $> 65$  or  $< 18$  years
- 197 c. Prior RT, chemotherapy or surgery for the primary tumor or nodes
- 198 d. Progressive disease (PD)/stable disease (SD) after 3 cycles of chemotherapy
- 199 e. Pregnancy or lactation
- 200 f. Any severe intercurrent disease, which may cause unacceptable risk factors or  
201 affect compliance with the trial, for example, severe heart diseases (cardiac  
202 functional grade of 3 or lower), severe pulmonary dysfunction (pulmonary  
203 function grade of 3 or lower), renal diseases, severe metal diseases.
- 204 g. Other invasive malignant diseases within the past 5 years, other than excised  
205 basal cell skin carcinoma, cervical carcinoma in situ, and superficial bladder  
206 tumors (Ta, Tis, and T1)

### 207 **3.3 Criteria for Removal from Protocol Treatment**

- 208 a. More than a 2-week delay in treatment due to prolonged drug toxicity
- 209 b. Unacceptable toxicity

- 210 c. Disease progression
- 211 d. Intercurrent diseases that affect the assessments of clinical status to a
- 212 significant degree or require discontinuation of the drugs, or both
- 213 e. Withdrawal from the study at any time for any reason

## 214 **4.0 Treatment Plan**

### 215 **4.1 Chemotherapy**

#### 216 **4.1.1 Cisplatin Plus Fluorouracil Regimen (Experimental and Control Arm)**

217 Cisplatin is intravenously given at a dose of  $100 \text{ mg/m}^2$  on day 1 and once every  
218 3 weeks for a maximum of six cycles

219 Fluorouracil is given at a dose of  $5 \text{ g/m}^2$  via a continuous intravenous infusion  
220 over 120 h once every 3 weeks for a maximum of six cycles.

221 *Note:*

222 \* If severe tumor compression and destruction symptoms occur during follow-up,  
223 including severe pain, pathological fracture, etc., then according to the clinical  
224 needs to control local symptoms and improve quality of life, the appropriate  
225 treatment will be provided, including surgery, RT and local chemotherapy (e.g.,  
226 TACE for the treatment of liver metastases).

#### 227 **4.1.2 Administration**

228 To prevent the nephrotoxic effects of cisplatin, we apply a 4-day hydration  
229 protocol before and during the administration of cisplatin (D0-D3) and used  
230 furosemide (D1) and mannitol (D1-D2). We use antiemetic drugs, such as the  
231  $5\text{-HT}_3$  receptor antagonist dexamethasone, to prevent chemotherapy-induced  
232 nausea and vomiting.

#### 233 **4.1.3 Dosage Adjustments**

234 4.1.3.1 Patients will be examined and graded each day when chemotherapy is

235 administered and weekly while receiving RT for subjective/objective evidence of  
 236 developing toxicity according to the CTCAE, v.3.0.

237 4.1.3.2 There is no dose escalation for cisplatin and fluorouracil.

| Cisplatin Dose Levels |                      |                       |
|-----------------------|----------------------|-----------------------|
| -2                    | -1                   | Starting Dose         |
| 60 mg/m <sup>2</sup>  | 80 mg/m <sup>2</sup> | 100 mg/m <sup>2</sup> |

238

| Fluorouracil Dose Levels |                        |                        |
|--------------------------|------------------------|------------------------|
| -2                       | -1                     | Starting Dose          |
| 3000 mg/m <sup>2</sup>   | 4000 mg/m <sup>2</sup> | 5000 mg/m <sup>2</sup> |

239

| Dose Adjustment for Hematologic Toxicity |        |                                 |                           |                              |
|------------------------------------------|--------|---------------------------------|---------------------------|------------------------------|
| Absolute Neutrophil Count                |        | Platelet Count                  | Cisplatin Dose Adjustment | Fluorouracil Dose Adjustment |
| >1.50x10 <sup>9</sup> /L                 | and    | >75.00x10 <sup>9</sup> /L       | Full dose                 | Full dose                    |
| 1.00-1.49 x10 <sup>9</sup> /L            | and/or | 50.00-74.99 x10 <sup>9</sup> /L | Decrease 1 Level          | Full dose                    |
| <1.00 x10 <sup>9</sup> /L                | and/or | <50.00 x10 <sup>9</sup> /L      | Decrease 2 Level          | Decrease 1 Level             |

240

| Dose Adjustment for Renal Toxicity |        |                                        |                           |                              |
|------------------------------------|--------|----------------------------------------|---------------------------|------------------------------|
| Absolute Creatinine                |        | Creatinine Clearance Rate <sup>1</sup> | Cisplatin Dose Adjustment | Fluorouracil Dose Adjustment |
| ≤ 1.5x upper normal value          | and/or | ≥ 50 mL/min                            | Full dose                 | Full dose                    |
| > 1.5x upper normal value          | and    | 40-50 mL/min                           | Decrease 1 Level          | Full dose                    |

|                           |     |            |                            |
|---------------------------|-----|------------|----------------------------|
| > 1.5x upper normal value | and | <40 mL/min | Withhold drug <sup>2</sup> |
|---------------------------|-----|------------|----------------------------|

241

242

| Dose Adjustment for Mucosal Toxicity |    |           |                              |
|--------------------------------------|----|-----------|------------------------------|
| Oral Mucositis                       |    | Diarrhea  | Fluorouracil Dose Adjustment |
| ≤ Level 2                            | or | ≤ Level 2 | Full dose                    |
| Level 3                              | or | Level 3   | Decrease 1 Level             |
| Level 4                              | or | Level 4   | Decrease 2 Level             |

243 <sup>1</sup>. The creatinine clearance is calculated with the Cockcroft formula.

244 <sup>2</sup>. If the creatinine clearance rate remains <40 mL/min, and/or the bilirubin level is  
 245 more than 2 times the upper normal limit, then the patient will not receive additional  
 246 cisplatin or fluorouracil.

## 247 **4.2 Radiotherapy**

248 Patients are examined and graded for subjective/objective evidence of acute  
 249 toxicities according to the CTCAE toxicity criteria.

### 250 **4.2.1 Radiotherapy Adjustments for Nonhematologic Toxicity:**

251 The side effects of RT may include mucositis and skin reactions. The  
 252 investigators manage these conditions according to the clinical practice at the  
 253 institution. We do not allow RT dose modifications. Treatment interruptions are  
 254 allowed if the symptomatic mucositis or skin reactions that occur warranted a  
 255 break in treatment, as judged by the attending clinician. The treatment is  
 256 completed according to the protocol and allowed for treatment breaks up to and  
 257 including 14 days. If the break exceeds 14 days, the patient will be removed from  
 258 the protocol treatment, the completion of treatment is at the discretion of his or  
 259 her physician, but the patient will be still followed up and included in the

260 analysis.

261 **4.2.2 Radiotherapy Adjustments for Hematologic Toxicity:**

262 RT will be withheld until the absolute neutrophil count is >500 and platelet count  
263 is >25000.

264 **4.2.3 Target Volume Determination for IMRT:**

265 RT is required to be given through IMRT techniques. The target volumes are  
266 delineated using pre-chemotherapy imaging data according to a previously  
267 described institutional treatment protocol and in accordance with the International  
268 Commission on Radiation Units and Measurements reports 50 and 62. The  
269 principles of target volume determination for IMRT and prescribed dose and  
270 fractionation are as follows:

| Term                     | Definition                                                                                                                                                                               | Note                                                                               |
|--------------------------|------------------------------------------------------------------------------------------------------------------------------------------------------------------------------------------|------------------------------------------------------------------------------------|
| Gross tumor volume (GTV) | The gross tumor determined by physical examination, imaging (including MRI and PET/CT) and endoscopic findings, including GTVnx and GTVnd                                                |                                                                                    |
| GTVnx                    | The sum of the primary tumor volume and enlarged retropharyngeal nodes                                                                                                                   |                                                                                    |
| GTVnd                    | Volume of the clinically involved gross lymph nodes                                                                                                                                      |                                                                                    |
| CTV1                     | GTVnx plus an additional anterior, superior, inferior and lateral margin of 5 mm to 10 mm and additional posterior margins of 2 mm to 3 mm (the range of extension was determined by the | The volume also included the entire mucosal stratum and 5 mm of the nasopharyngeal |

|                |                                                                                                                                                                                                                                                                                                                                                                          |                                                                                                                  |
|----------------|--------------------------------------------------------------------------------------------------------------------------------------------------------------------------------------------------------------------------------------------------------------------------------------------------------------------------------------------------------------------------|------------------------------------------------------------------------------------------------------------------|
|                | characteristics of the adjacent structures)                                                                                                                                                                                                                                                                                                                              | submucosal stratum                                                                                               |
| CTV2*          | CTV1 plus an additional anterior, superior, inferior and lateral margin of 5 mm to 10 mm and an additional posterior margin of 2 mm to 3 mm (the range of extension was determined by the characteristics of the adjacent structures), as well as the GTVnd plus possible tumor-draining lymph node groups that were at risk for potential microscopic spread of disease | The range for prophylactic neck radiation extended from the involved lymph node groups to 1 or 2 adjacent groups |
| PTV            | Generally, PTVnx, PTVnd, PTV1, and PTV2 refers to GTVnx, GTVnd, CTV1, and CTV2 plus an additional margin, an anterior, superior, inferior, lateral extension of 5 mm, and a posterior extension of 3 mm, respectively                                                                                                                                                    |                                                                                                                  |
| Organs at risk | Brainstem, temporal lobe, lens, eyeballs, optic nerves, optic chiasm, pituitary, parotid gland, temporomandibular joint, mandible, larynx, oral cavity, salivary gland, and inner and middle ear                                                                                                                                                                         | Organs could be added or removed according to the actual situation                                               |

271 \*Level Ib was electively irradiated if the following conditions were met: (1) the level  
272 Ib lymph nodes (LNs) were involved; (2) the level Ila LNs had extracapsular  
273 extension or a diameter  $\geq 3$  cm; (3) there was extensive nodal disease on the  
274 ipsilateral neck; or (4) the soft or hard palate, oral cavity, or ipsilateral nasal cavity  
275 was grossly involved.



276 **4.2.4 Prescribed Dose and Fractionation:**

277 All patients are treated with IMRT using a simultaneously integrated boost with 5  
 278 fractions per week. The prescribed doses are 66–70 Gy to the planning target  
 279 volume (PTV), 56-66 Gy to PTV1, 50-60 Gy to PTV2, and 60–66 Gy to the PTV  
 280 of the involved cervical LNs in 28 to 33 fractions.

281 **4.2.5 Normal Tissue Dose Constraints:**

282 Normal Tissue Dose Constraint Structure

| Structure               | Dose constraints                  |
|-------------------------|-----------------------------------|
| Spinal cord             | $D_{max}^* \leq 45 \text{ Gy}$    |
| Spinal cord_PRV         | $D1^{\approx} \leq 54 \text{ Gy}$ |
| Brain stem              | $D_{max} \leq 54 \text{ Gy}$      |
| Brain stem_PRV          | $D1 \leq 60 \text{ Gy}$           |
| Optic nerves            | $D_{max} \leq 54 \text{ Gy}$      |
| Optic nerves_PRV        | $D1 \leq 60 \text{ Gy}$           |
| Optic chiasm            | $D_{max} \leq 54 \text{ Gy}$      |
| Optic chiasm_PRV        | $D1 \leq 60 \text{ Gy}$           |
| Temporal lobe           | $D_{max} \leq 60 \text{ Gy}$      |
| Temporal lobe_PRV       | $D1 \leq 65 \text{ Gy}$           |
| Lens                    | $D_{mean}^{\circ} < 8 \text{ Gy}$ |
| Pituitary               | $D_{max} \leq 60 \text{ Gy}$      |
| Eyes                    | $D_{mean} < 35 \text{ Gy}$        |
| Mandible                | $D_{max} \leq 70 \text{ Gy}$      |
| Temporomandibular joint | $D_{max} \leq 70 \text{ Gy}$      |
| Parotid                 | $D_{mean} < 26 \text{ Gy}$        |

|         |                            |
|---------|----------------------------|
| Parotid | V30 <sup>&amp;</sup> < 50% |
| Cochlea | Dmean < 50 Gy              |
| Larynx  | Dmean < 45 Gy              |

283 PRV=planning organ-at-risk volume.

284 \*Maximum point dose to the target volume.

285 <sup>~</sup>Dose received by 1% of the target volume.

286 <sup>o</sup>Mean dose to the target volume.

287 <sup>&</sup>At least 50% of the gland received <30 Gy (was achieved in at least gland)

### 288 **4.3 Salvage Therapy**

289 Second- or third-line chemotherapy will be provided for patients with disease  
 290 progression. Local treatment for metastatic lesions, including definitive RT, surgical  
 291 resection, ablation, or other treatments are used for some patients to control local  
 292 symptoms and eliminate metastases in the bone, liver, lungs, or other organs.  
 293 Additionally, locoregional RT are also offered in the chemotherapy alone group.

### 294 **Observation and Assessment**

295 During the initial screening period, eligible mNPC patients are treated with a cisplatin  
 296 plus fluorouracil regimen. After 3 cycles of chemotherapy, an efficacy evaluation will  
 297 be performed, and a second screening process (screening confirmation period) will be  
 298 also performed. The patients who are evaluated to achieve CR or PR after 3 cycles of  
 299 chemotherapy will be officially registered and enrolled. Patients who are not sensitive  
 300 to chemotherapy (evaluated as having SD or PD after 3 cycles of chemotherapy) will  
 301 be excluded.

### 302 **5.1 Initial Screening Period**

303 All patients are under standardized management for NPC, and they need to  
 304 undergo a series of examinations as well as provide relevant information to  
 305 confirm their pathologic diagnosis and clinical stage before being admitted into

- 306 the trial, including the following:
- 307 a. Medical history review
  - 308 b. Personal data collection
  - 309 c. Review of present medications and treatment
  - 310 d. Body examinations, including height, weight, and vital signs
  - 311 e. Physical examination of the head and neck region, including the
  - 312 nasopharyngeal and cervical LNs
  - 313 f. Physical examination of the nervous system
  - 314 g. Nasal endoscopy and lesion biopsy
  - 315 h. Biopsy or needle aspiration of distant metastases
  - 316 i. Blood routine
  - 317 j. Urine routine
  - 318 k. Blood biochemistry
  - 319 l. Imaging test of the tumor (enhanced MR or enhanced CT of the head and
  - 320 neck (CT was indicated only in patients with contraindications to MRI))
  - 321 m. PET/CT is compulsorily required during the initial screening period\*
- 322 \*Patients who underwent PET/CT examinations did not need chest X-rays,
- 323 abdominal ultrasonography, or ECT bone scans.

## 324 **5.2 Screening Confirmation Period**

- 325 a. PET-CT, MRI and/or CT of the primary tumor and distant metastases, which is
- 326 performed after treatment, and CR, PR, SD, or PD is evaluated according to the
- 327 RECIST version 1.1 criteria.
- 328 b. Physical examinations of the head and neck region, including the
- 329 nasopharyngeal and cervical LNs

## 330 **5.3 During Treatment**

- 331 The following aspects need to be assessed from the start to the end of treatment.
- 332 a. MRI and/or CT of the primary tumor and distant metastases, which is  
333 performed after treatment, and CR, PR, SD, or PD is evaluated according to the  
334 RECIST version 1.1 criteria. The chest films and abdominal ultrasonography are  
335 reexamined after treatment. PET-CT and ECT bone scans are performed as  
336 clinically indicated.
- 337 b. General conditions
- 338 c. Acute and late toxicities assessment (NCI-CTC, version 3.0), including for  
339 hematological toxicity, gastrointestinal reactions, hepatotoxicity, nephrotoxicity,  
340 mucositis, neurotoxicity, ototoxicity, etc.
- 341 d. Peripheral neuropathy
- 342 e. Laboratory tests: blood routine and blood biochemistry are required within 1  
343 week prior to each cycle of chemotherapy and once per week during treatment.

#### 344 **6.0 Follow-Up and Recording of Events**

345 After completing treatment, the patients are followed up every 2 to 3 months until  
346 death to evaluate the patients' recent and long-term efficacy and safety profiles.

347 Follow-up method: Record of the patient's examination data, a doctor's letter with  
348 signature to document the visit, or a doctor's follow-up records collected by telephone

349 Follow-up content: Routine examination of the nasopharyngeal lesions and LNs, and  
350 B-mode ultrasound, chest X-ray, and CT or MR examinations of the distant  
351 metastases every 3 months. PET/CT or bone scintigraphy are performed when  
352 clinically indicated. The treatment responses are also evaluated according to the  
353 RECIST criteria. The earliest date of detecting symptomatic late toxicities and the  
354 eventual maximum grade according to the Late Radiation Morbidity Scoring Criteria  
355 of the Radiation Therapy Oncology Group (RTOG) and European Organization for

356 Research and Treatment of Cancer (EORTC) are recorded.

## 357 **7.0 Security Measures and Quality Control**

- 358 a. Provide a systemic learning program for every member in the research group  
359 Assigned one doctor in each center to lead tumor staging, which must be in  
360 accordance with the 7<sup>th</sup> edition AJCC guidelines and to ensure that every patient  
361 enrolled is eligible. Patients are assigned to their groups based on random numbers
- 362 b. Make a monitoring plan for adverse effects and an emergency plan
- 363 c. Research plan is made by all participating centers and approved by the ethics  
364 committee
- 365 d. Develop various standard operation procedures related to this study
- 366 e. Establish a standardized evaluation system to unify the diagnostic criteria, curative  
367 effect judging criteria, etc.
- 368 f. Establish professional statistical plans
- 369 g. Research staff members are trained before the study
- 370 h. Ensure that every participating center conducts the study at the same pace
- 371 i. Arrange a quality controller to create a quality control plan and regularly check on  
372 the study
- 373 j. Set up a coordination committee, curative effect judging group and follow-up  
374 team

## 375 **8.0 Statistical Analysis**

### 376 **8.1 Endpoint Definitions**

#### 377 **8.1.1 Primary Endpoint**

378 OS is defined as the time from random assignment to death from any cause, or  
379 the patient was censored at the date of the last follow-up.

#### 380 **8.1.2 Secondary Endpoints**

381 8.1.2.1 Progression-free survival (PFS): PFS is defined as the time from random  
382 assignment to the date of documented local or regional relapse, distant metastasis,  
383 or death from any cause, whichever occurs first.

384 8.1.2.2 Short-term response: Treatment response is assessed by imaging by  
385 independent image committee every three cycles until disease progression. The  
386 nasopharyngeal tumor, cervical LN, and distant metastasis responses are observed  
387 and evaluated by physical examinations, nasopharyngoscopy, and MRI/CT  
388 imaging. Tumor response is classified according to the RECIST criteria, version  
389 1.1. CR is defined as the disappearance of all target lesions. Any pathological  
390 LNs (whether target or nontarget) must have been reduced in the short axis to <10  
391 mm. PR is defined as an at least 30% decrease in the sum of diameters of the  
392 target lesions, with the baseline diameter sum serving as the reference. PD is  
393 defined as an at least 20% increase in the sum of diameters of the target lesions,  
394 with the smallest sum during study serving as the reference (including the  
395 baseline sum). In addition to a relative increase of 20%, the sum must also  
396 demonstrate an absolute increase of at least 5 mm. (Note: the appearance of one  
397 or more new lesions is also considered disease progression). SD is defined as  
398 both insufficient size reduction to qualify as PR and an insufficient increase to be  
399 considered PD, with the smallest diameter sum during the study serving as the  
400 reference. Proportion of patients who have a confirmed objective response are  
401 defined as a CR or PR from the first evaluation after 3 cycles of chemotherapy  
402 with PF until disease progression or death according to the RECIST 1.1 criteria).  
403 Proportion of patients who achieve disease control are defined as an objective  
404 response and stable disease.

405 8.1.2.3 Safety indicators: Acute toxicities are assessed according to the

406 NCI-CTC version 3.0. The acute toxicities include hematologic toxicity,  
407 mucositis, allergic reactions and other adverse events and serious adverse events.  
408 Late radiation toxicities are assessed using the RTOG and EORTC late radiation  
409 morbidity scoring scheme. The late toxicities include neurotoxicity, ototoxicity  
410 and other complications and sequelae.

## 411 **8.2 Sample Size Estimate**

412 To confirm the superiority of systemic chemotherapy plus RT over systemic  
413 chemotherapy alone regarding OS. On the basis of previous reports<sup>22,23,24</sup>, we  
414 assume that 2-year OS rate is 51.0% for patients treated with systemic  
415 chemotherapy alone, and 70.0% for patients treated with systemic chemotherapy  
416 plus radiotherapy, with a target hazard ratio (HR) of 0.530. The log-rank test is  
417 used to calculate the sample size. The expected length of the accrual period is 3  
418 years, and the expected maximum length of follow-up is 5 years. The two-sided  
419 type I error is 0.05 ( $\alpha = 0.05$ ), and the power is 0.90 ( $1-\beta$ ). After accounting for a  
420 10% dropout rate, we estimate that a total of 204 participants are needed, (102  
421 participants in each group), in order for 104 events to be observed for the primary  
422 analysis of overall survival.

423

## 424 **8.3 Independent Trial Data Monitoring Committee (IDMC)**

425 The PI hired Professor Yi-Min Liu as the IDMC for this study. After the enrolled  
426 patients are registered, all patient information will be sent to the IDMC, who  
427 manage the database, and is involved in the statistical analysis, data interpretation,  
428 and toxicity data review. As per institutional (SYSUCC) practice, the data is to be  
429 reviewed once a year to evaluate safety. Futility is also assessed to avoid  
430 over-treatment of patients with metastatic disease. For the final analysis, this is to

431 be performed by the investigators (Rui You and Sze Huey Tan).

432

433

434

435

436

437

438

439

440 **Members of the Independent Data Monitoring Committee (IDMC).**

| <b>Position</b> | <b>Name</b>     | <b>Job Title</b>                                                                                                                                         | <b>Specialty</b>         |
|-----------------|-----------------|----------------------------------------------------------------------------------------------------------------------------------------------------------|--------------------------|
| Chairman        | Yi-Min<br>Liu   | Department of Radiotherapy<br>Oncology, Sun Yat-sen Memorial<br>Hospital, Sun Yat-sen<br>University/Professor                                            | Radiotherapy<br>Oncology |
| Member          | Wen<br>Chen     | School of Public Health, Sun<br>Yat-sen University/Professor                                                                                             | Health Statistics        |
| Member          | Gang Li         | Department of<br>Otorhinolaryngology, Southern<br>Medical University Nanfang<br>Hospital/Professor                                                       | Otorhinolaryngology      |
| Member          | Yi Pan          | Department of Radiotherapy<br>Oncology, Guangdong Provincial<br>People's Hospital/Professor                                                              | Radiotherapy<br>Oncology |
| Member          | Jing-Qi<br>Chen | The Ethics Committee and<br>Department of Medical Oncology<br>of the Second Affiliated Hospital<br>of Guangzhou Medical University<br>Chairman/Professor | Oncology                 |

441



## 442 **8.4 Stratification/Randomization Scheme**

### 443 **8.4.1 Stratification**

444 Patients are stratified according to treatment centers (Sun Yat-sen University  
445 Cancer Center, Guangdong Provincial People's Hospital, and The First Affiliated  
446 Hospital, Sun Yat-sen University), the number of metastatic lesions (1-2 vs  $\geq 3$ )  
447 and treatment response (complete response vs partial response).

### 448 **8.4.2 Randomization**

449 The patients who are evaluated achieving CR or PR after 3 cycles of  
450 chemotherapy are officially registered, enrolled and randomized. The eligible  
451 patients are randomized using a 1:1 allocation to a chemotherapy plus RT arm  
452 and a chemotherapy alone arm. Stratified randomization is performed within each  
453 stratum based on the number of metastatic lesions, the treatment centers and  
454 treatment response. The randomized block design is conducted by the data  
455 management team, and the data management team choose the block size so that  
456 each block contains an equal proportion of patients. This procedure helps to  
457 ensure both randomness and investigator blinding (the block sizes are known only  
458 by the data management treatment), as recommended by Friedman et al  
459 (Friedman J, Furberg, C, DeMets D. Fundamentals of clinical trials. New York:  
460 Springer-Verlag; 1998). Randomization is performed by the data management  
461 team, and the results are placed in opaque, sealed envelopes labeled by stratum,  
462 which are only unsealed after patient registration. The patients are identified by a  
463 unique subject number that remains consistent for the duration of the study.

### 464 **8.5 Case Report Form (CRF)**

465 The required CRF is designed before the study to record the detailed medical  
466 history, treatment outcomes and follow-up information; the CRF is designed to be

467 easy to fill in and to save in the database.

## 468 **8.6 Analytical Approach**

469 The results of our study are analyzed by the intention-to-treat (ITT) approach, and  
470 all eligible patients are analyzed according to the randomization scheme,  
471 including the patients whose treatment plan is changed from chemotherapy plus  
472 RT to chemotherapy alone. The Kaplan-Meier estimator is used to estimate the  
473 survival function from lifetime data, and the log-rank test is used to compare the  
474 differences in survivals between the two groups. The response rates and incidence  
475 of toxicities are compared by the chi-square test. The Cox proportional-hazards  
476 model is used to calculate the hazard ratios and 95% confidence intervals. The  
477 statistical tests are two-sided, and a P value < 0.05 is considered statistically  
478 significant.

479 The analyses included the following:

480 General information: The distribution and equilibrium of general factors, such as  
481 age, sex, and disease stage, are assessed.

482 Adverse effects:

483 Acute and late toxicities, sequelae and complications in each arm are assessed  
484 according to NCI-CTC version 3.0

485 Short-term effects:

486 CR, PR, SD, PD, overall response rate, and disease control rate are evaluated  
487 with the RECIST criteria.

488 Long-term curative effects:

489 24-months OS and PFS rates, median OS, median PFS are calculated according  
490 to follow-up data.

## 491 **9.0 Ethical Considerations**

492 9.1 This study was approved by an appropriate institutional ethics committee.

493 9.2 Informed consent is obtained from the individual patients. A copy of the  
494 consent form and contact number for the investigators and ethics committee  
495 are available to the patients upon request.

496 9.3 The advantages and disadvantages of chemotherapy plus RT in treating  
497 mNPC patients are mentioned below:

498 9.3.1 Advantages:

499 a. Chemotherapy plus RT is expected to bring significant survival benefits to  
500 mNPC patients.

501 b. Locoregional RT is expected to significantly improve the compressive and  
502 destructive symptoms caused by nasopharyngeal and cervical tumors, such as  
503 headache and bleeding.

504 c. Locoregional RT might help minimize the metastatic spread of NPC cells.

505 d. Active locoregional RT is beneficial for the patients' determination to fight  
506 cancer and improve their mental state.

507 9.3.2 Disadvantages:

508 a. Chemotherapy plus RT increases the financial burden for mNPC patients.

509 b. Locoregional RT causes radiation injuries such as dry mouth and sore throat,  
510 thereby affecting the quality of life of some patients.

511 9.4 Chemotherapy plus RT is expected to bring significant survival benefits to  
512 patients [22-25], to control local symptoms, to reduce further distant metastasis  
513 and to improve the patient's mental state, thus greatly benefiting patients, their  
514 family and society. Moreover, previous studies have shown that most NPC  
515 patients could tolerate RT well and that the complications from radiation were  
516 acceptable, especially in the IMRT era. Although RT could increase the economic

517 burden of patients to a certain extent, distant metastases of NPC are incurable,  
518 and proportionally, the RT costs are relatively low over the course of long-term  
519 treatment. More importantly, if the use of locoregional RT can help patients  
520 achieve a longer tumor remission time and a better survival outcome, then the use  
521 of RT will lower the cost of treatment and thus the overall cost. Therefore, the  
522 advantages of using locoregional RT for mNPC will outweigh the disadvantages.

## 523 **10.0 References**

- 524 1. Su SF, Han F, Zhao C, *et al.* Long-term outcomes of early-stage nasopharyngeal  
525 carcinoma patients treated with intensity-modulated radiotherapy alone. *Int J*  
526 *Radiat Oncol Biol Phys* 2012;82:327-333.
- 527 2. Xiao WW, Huang SM, Han F, *et al.* Local control, survival, and late toxicities of  
528 locally advanced nasopharyngeal carcinoma treated by simultaneous modulated  
529 accelerated radiotherapy combined with cisplatin concurrent chemotherapy:  
530 long-term results of a phase 2 study. *Cancer* 2011;117:1874-1883.
- 531 3. Lee AW, Tung SY, Chan AT, *et al.* Preliminary results of a randomized study  
532 (NPC-9902 Trial) on therapeutic gain by concurrent chemotherapy and/or  
533 accelerated fractionation for locally advanced nasopharyngeal carcinoma. *Int J*  
534 *Radiat Oncol Biol Phys* 2006;66:142-151.
- 535 4. Lee AW, Poon YF, Foo W, *et al.* Retrospective analysis of 5037 patients with  
536 nasopharyngeal carcinoma treated during 1976-1985: overall survival and  
537 patterns of failure. *Int J Radiat Oncol Biol Phys*, 1992; 23:261-70.
- 538 5. Teo PM, Kwan WH, Lee WY, *et al.* Prognosticators determining survival  
539 subsequent to distant metastasis from nasopharyngeal carcinoma. *Cancer*, 1996;  
540 77:2423-31.
- 541 6. Sham JS, Choy D, Choi PH: Nasopharyngeal carcinoma: the significance of neck

542 node involvement in relation to the pattern of distant failure. *Br J Radiol*, 1990;  
543 63:108-13.

544 7. Loong HH, Ma BB, Chan AT. Update on the management and therapeutic  
545 monitoring of advanced nasopharyngeal cancer. *Hematol Oncol Clin North Am*  
546 2008; 22:1267-1278.

547 8. Demicheli, R. et al. Tumor dormancy and surgery-driven interruption of  
548 dormancy in breast cancer: learning from failures. *Nat. Clin. Pract. Oncol.* 2007,  
549 4:699–710.

550 9. Flanigan RC, Salmon SE, Blumenstein BA, et al: Nephrectomy followed by  
551 interferon alfa-2b compared with interferon alfa-2b alone for metastatic  
552 renal-cell cancer. *N Engl J Med*, 2001; 345:1655-9.

553 10. Mickisch GH, Garin A, van Poppel H, et al: Radical nephrectomy plus  
554 interferon-alfa-based immunotherapy compared with interferon alfa alone in  
555 metastatic renal-cell carcinoma: a randomised trial. *Lancet*, 2001; 358:966-70.

556 11. Rapiti E, Verkooijen HM, Vlastos G, et al: Complete excision of primary breast  
557 tumor improves survival of patients with metastatic breast cancer at diagnosis. *J*  
558 *Clin Oncol*, 2006; 24:2743-9.

559 12. Ruiterkamp, J. et al. Impact of breast surgery on survival in patients with distant  
560 metastases at initial presentation: a systematic review of the literature. *Breast*  
561 *Cancer Res. Treat.* 2010, 120: 9–16.

562 13. Le Scodan R, Stevens D, Brain E, et al: Breast cancer with synchronous  
563 metastases: survival impact of exclusive locoregional radiotherapy. *J Clin Oncol*, 2009;  
564 27:1375-81.

- 565 14. Weckermann, D. *et al.* Perioperative activation of disseminated tumor cells in  
566 bone marrow of patients with prostate cancer. *J. Clin. Oncol*, 2009, 27:1549–  
567 1556 .
- 568 15. Widmark, A. *et al.* Endocrine treatment, with or without radiotherapy, in locally  
569 advanced prostate cancer (SPCG-7/SFUO-3): an open randomised phase III trial.  
570 *Lancet*, 2009, 373: 301–308.
- 571 16. Tan, A. & Parker, C. Radiotherapy in locally advanced prostate cancer. *Lancet*,  
572 2009, 373: 274–276.
- 573 17. Thompson IM, Tangen C, Basler J, et al: Impact of previous local treatment for  
574 prostate cancer on subsequent metastatic disease. *J Urol*, 2002; 168:1008-12,  
575 2002.
- 576 18. Engel, J. *et al.* Survival benefit of radical prostatectomy in lymph node-positive  
577 patients with prostate cancer. *Eur. Urol*, 2010, 57:754–761.
- 578 19. Morgan SC, Parker CC. Local treatment of metastatic cancer--killing the seed or  
579 disturbing the soil? *Nat Rev Clin Oncol* 2011;8:504-506.
- 580 20. Sham JS, Choy D, Choi PH. Nasopharyngeal carcinoma: the significance of neck  
581 node involvement in relation to the pattern of distant failure. *Br J Radiol*  
582 1990;63:108-113.
- 583 21. National Comprehensive Cancer Network. NCCN Clinical Practice Guidelines in  
584 Oncology. Head and Neck Cancers (v.2.2011)  
585 [http://www.nccn.org/professionals/physician\\_gls/PDF/head-and-neck.pdf](http://www.nccn.org/professionals/physician_gls/PDF/head-and-neck.pdf).
- 586 22. Setton J, Wolden S, Caria N, *et al.* Definitive treatment of metastatic  
587 nasopharyngeal carcinoma: Report of 5 cases with review of literature. *Head*  
588 *Neck*, 2012;34:753-757.
- 589 23. Lin S, Tham IW, Pan J, *et al.* Combined high-dose radiation therapy and

590 systemic chemotherapy improves survival in patients with newly diagnosed  
591 metastatic nasopharyngeal cancer. *Am J Clin Oncol*, 2012;35:474-479.

592 24. Chen MY, Jiang R, Guo L et al. Locoregional radiotherapy in patients with distant  
593 metastases of nasopharyngeal carcinoma at diagnosis. *Chin J Cancer* 2013; 32:  
594 604-613.

595

596 Appendix I

597 STAGING CRITERIA – the 7<sup>th</sup> AJCC edition

598 Tumor

599 • T1 - confined to the nasopharynx, or the tumor extends to the oropharynx  
600 and/or nasal cavity without parapharyngeal extension

601 • T2 - tumor with parapharyngeal extension (posterolateral infiltration, i.e.,  
602 beyond the pharyngobasilar fascia)

603 • T3 - involves the bony structures and/or paranasal sinuses

604 • T4 - intracranial extension and/or involvement of the cranial nerves,  
605 infratemporal fossa, hypopharynx, orbit, or masticator space

606 Nodes

607 • N1 - unilateral nodes (6 cm or less) above the supraclavicular fossa, and/or  
608 retropharyngeal LNs 6 cm or less (unilateral or bilateral)

609 • N2 - bilateral nodes (6 cm or less) above the supraclavicular fossa

610 • N3a - lymph nodes greater than 6 cm

611 • N3b - extension to the supraclavicular fossa (defined as the triangular region  
612 described by Ho and bounded by the superior margin of the sternal head of the  
613 clavicle, the superior margin of the lateral end of the clavicle, and the point  
614 where the neck meets the shoulder. These features are present in some level IV as  
615 well as level V tumors.)

616 Overall stage

617 • I - T1 N0

618 • II - T1-T2 N1, T2 N0 (i.e., T2 or N1)

619 • III - T3 N0-2, or T1-3 N2 (i.e., T3 or N2)

620 • IVA - T4 N0-2



621 • IVB - N3

622 • IVC - M1

623

## 625 Performance status (Karnofsky scale)

|     |                                                                                          |
|-----|------------------------------------------------------------------------------------------|
| 100 | No complaints; no evidence of disease                                                    |
| 90  | Able to carry on normal activity; minor signs or symptoms of disease                     |
| 80  | Able to normal activity; some signs or symptoms of disease                               |
| 70  | Cares for self; unable to normal activity or to do active work                           |
| 60  | Requires occasional assistance but is able to care for most of his or her personal needs |
| 50  | Requires considerable assistance and frequent medical care                               |
| 40  | Disabled; requires special care and assistance                                           |
| 30  | Severely disabled; hospitalization indicated, although death not imminent                |
| 20  | Very sick; hospitalization necessary; requires active supportive treatment               |
| 10  | Moribund; fatal processes progressing rapidly                                            |
| 0   | Dead                                                                                     |
