# Supplementary material
Source: PubMed Central journal article supplement (PMC7378870)
Supplement: jamaoncol-e201808-s002.pdf [file jamaoncol-e201808-s002.pdf]

## Supplementary Online Content

You R, Y-P Liu; P-Y Huang, et al. Efficacy and safety of locoregional radiotherapy with chemotherapy vs chemotherapy alone in de novo metastatic nasopharyngeal carcinoma: a multicenter randomized phase 3 clinical trial. *JAMA Oncol*. Published online July 23, 2020. doi:10.1001/jamaoncol.2020.1808

**eAppendix 1.** Chemotherapy dose modification

**eAppendix 2.** Intensity-modulated radiation therapy (IMRT) planning protocol in this trial

**eFigure 1.** Median relative dose intensity of cisplatin and 5-fluorouracil in each cycle

**eFigure 2.** Forest plots of treatment effects on Overall Survival within subgroups

**eTable 1.** Chemotherapy and local treatment in primary metastasized malignancies

**eTable 2.** Chemotherapy plus local radiotherapy in metastatic NPC

**Table 3.** Distribution of patients by site of enrollment

**Table 4.** Members of the Independent Data Monitoring Committee (IDMC)

**Table 5.** Members of the ethics committee of SYSUCC

**Table 6.** Treatment exposure in the intention-to-treat population

**Table 7.** Disease recurrence distribution in the two treatment groups

**Table 8.** Summary of subsequent therapies

This supplementary material has been provided by the authors to give readers additional information about their work.

## **Chemotherapy dose modification**

To prevent the nephrotoxic effects of cisplatin, we provided 4-day hydration before and during cisplatin administration (D0-D3) along with furosemide (D1) and mannitol (D1-D2). We used antiemetic drugs such as the 5-HT<sub>3</sub>-receptor antagonist dexamethasone to prevent chemotherapy-induced nausea and vomiting.

We applied the following recommendations for treatment interruption and dose reduction: the cisplatin dose was decreased to 80 mg/m<sup>2</sup> if the absolute neutrophil count was 1000-1500 cells per  $\mu$ L, platelet count was 50000-75000 per  $\mu$ L, or creatinine clearance was 40-50 mL/min; the cisplatin dose was decreased to 60 mg/m<sup>2</sup> if the absolute neutrophil count was less than 1000 cells per  $\mu$ L or the platelet count was less than 50000 per  $\mu$ L; the 5-fluorouracil dose was decreased to 4 g/m<sup>2</sup> in cases of grade 3 mucositis or diarrhea; and the 5-fluorouracil dose was decreased to 3 g/m<sup>2</sup> in cases of grade 4 mucositis or diarrhea.

Chemotherapy was stopped if the creatinine clearance rate fell below 40 mL/min and/or the bilirubin level was more than 2 times the upper limit of the normal value.

## **Intensity-modulated radiation therapy (IMRT) planning protocol in this trial**

All patients were immobilized in the supine position, using a thermoplastic mask that covered the head, neck, and shoulder regions. Both non-enhanced CT (for dose calculation) and contrast-enhanced CT (for target delineation) images were obtained from the vertex to 2cm below the sternoclavicular joint at 3 mm slice thickness.

Target volumes were defined in accordance with the International Commission on Radiation Units and Measurements (ICRU) reports 50 and 62. The primary nasopharyngeal gross tumor volume (including retropharyngeal nodes; GTVnx) and corresponding cervical lymph node volumes (GTVnd) were determined with magnetic resonance imaging/computerized tomography (MRI/CT) imaging, as well as <sup>18</sup>F-fluorodeoxyglucose-positron emission tomography-CT (<sup>18</sup>F-FDG-PET-CT) imaging, clinical examination and endoscopic findings before chemotherapy. The high-risk clinical tumor volume (CTV1) was defined by the pre-chemotherapy GTVnx with a 0.5-1.0 cm margin (0.2-0.3 cm posterior margin). The low-risk clinical target volume (CTV2) was defined as CTV1 plus a 0.5-1.0 cm margin (0.2-0.3 cm posterior margin) to encompass the clivus, sphenoid sinus, foramen lacerum, ovale and spinosum, parapharyngeal space, pterygoid fossa, posterior nasal cavity, pterygopalatine fossa, retropharyngeal nodal regions, the involved and at-risk cervical nodal levels, including levels II to Vb, and the supraclavicular fossa. Level Ib was electively irradiated if: 1) level Ib lymph nodes (LNs) were involved, 2) presence of extracapsular extension or size of  $\geq 3$  cm nodes at level IIa, and 3) involvement of the soft or hard palate, oral cavity, or ipsilateral nasal cavity. PTV1 and PTV2 were created by adding a circumferential 0.5 cm margin (0.3 cm posterior margin) to CTV1 and CTV2 to compensate for uncertainties in treatment set-up and internal organ motion. A 0.3 cm margin was added to the critical organs (e.g., brainstem and spinal cord) to form the planning organ at risk volume (PRV).

The prescribed doses were 70 Gy to the pre-chemotherapy GTVnx, 60-66 Gy to

the pre-chemotherapy GTVnd (60 Gy and 66 Gy for complete and partial response to six cycles of PF, respectively), 56-66 Gy to PTV1, and 50-60 Gy to PTV2 in 33 fractions, five times per week. The normal tissue dose constraints are listed in Table below. All plans were generated by a team of dosimetrists using a wide-field simultaneous integrated boost technique. In general, when critical normal tissues (e.g. brain stem and spinal cord) were adjacent to the high-dose target volumes, the target volume coverage is compromised to not exceed the dose constraints. All radiotherapy plans underwent quality assurance by independent peer review at each recruiting site. Time to commencement of radiotherapy from the end of chemotherapy cycle was set at 21 days.

**Normal tissue dose constraints used for plan optimization.**

| <b>Structure</b> | <b>Dose constraints</b> |
|------------------|-------------------------|
| Spinal cord      | Dmax* ≤45 Gy            |
| Spinal cord_PRV  | D1† ≤54 Gy              |
| Brain stem       | Dmax ≤54 Gy             |
| Brain stem_PRV   | D1 ≤60 Gy               |
| Optic nerves     | Dmax ≤54 Gy             |
| Optic nerves_PRV | D1 ≤60 Gy               |
| Optic chiasm     | Dmax ≤54 Gy             |
| Optic chiasm_PRV | D1 ≤60 Gy               |
| Temporal lobe    | Dmax ≤60 Gy             |

|                         |              |
|-------------------------|--------------|
| Temporal lobe_PRV       | D1 ≤65 Gy    |
| Lens                    | Dmean‡ <8Gy  |
| Pituitary               | Dmax ≤60 Gy  |
| Eyes                    | Dmean <35 Gy |
| Mandible                | Dmax ≤70 Gy  |
| Temporomandibular joint | Dmax ≤70 Gy  |
| Parotid                 | Dmean <26 Gy |
| Parotid                 | V30¶ <50%    |
| Cochlea                 | Dmean <50 Gy |
| Larynx                  | Dmean <45 Gy |

PRV=planning organ-at-risk volume.

\*Maximum point dose to the target volume.

†Dose received by 1% of the target volume.

‡ Mean dose to the target volume.

¶At least 50% of the gland received <30 Gy (was achieved in at least gland)

**Figure S1. Median relative dose intensity of cisplatin and 5-fluorouracil in each cycle.**

**cisplatin (A); 5-fluorouracil (B)**

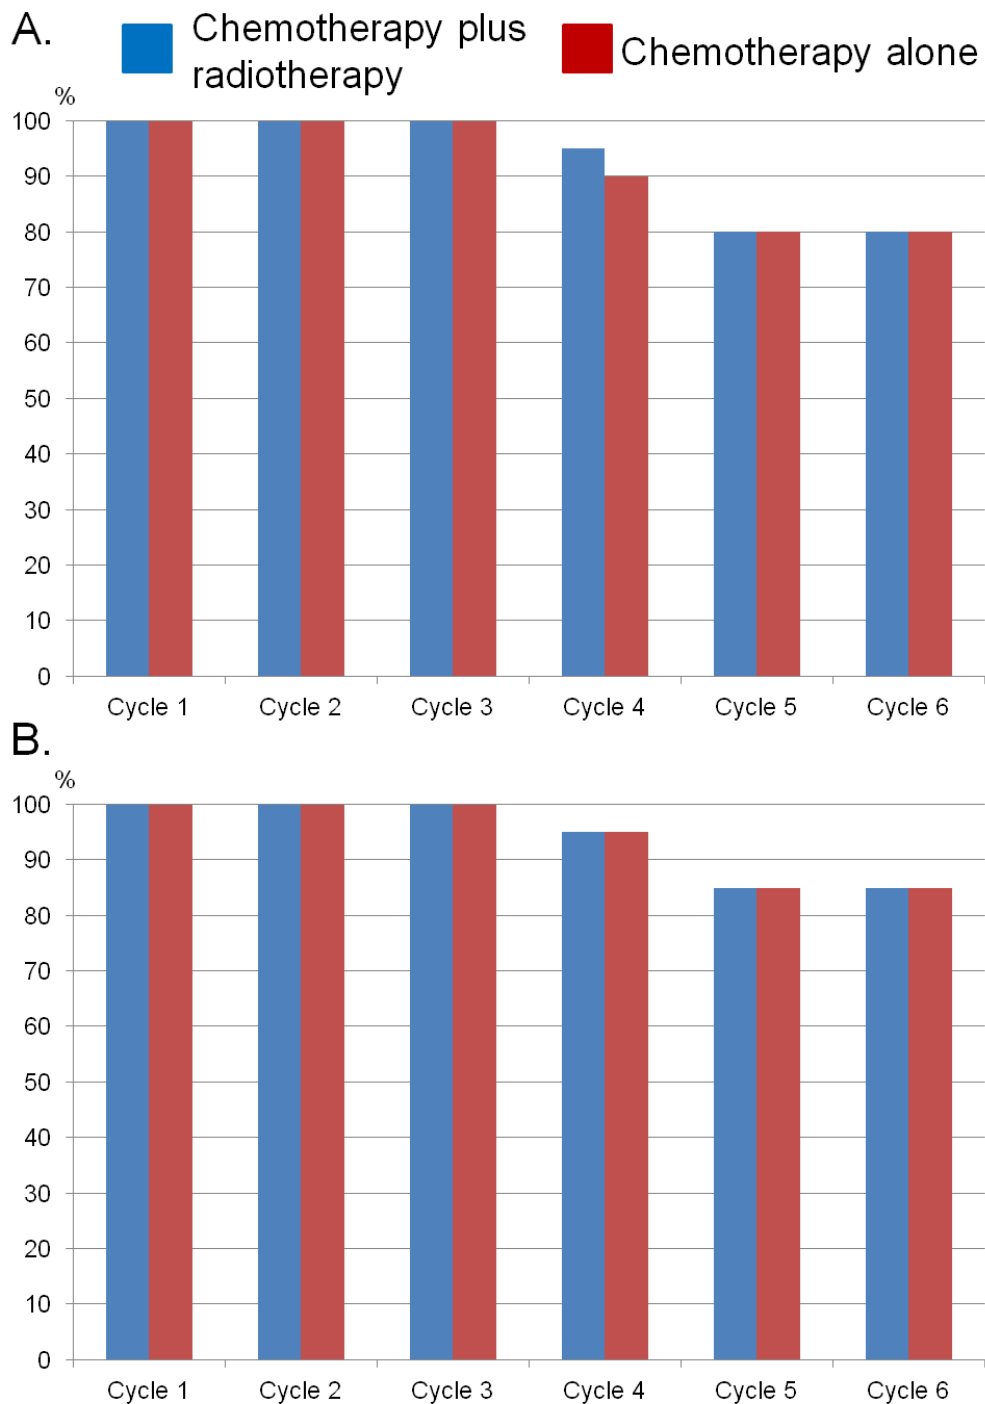

**Figure S2.** Treatment effect on overall survival within subgroups .

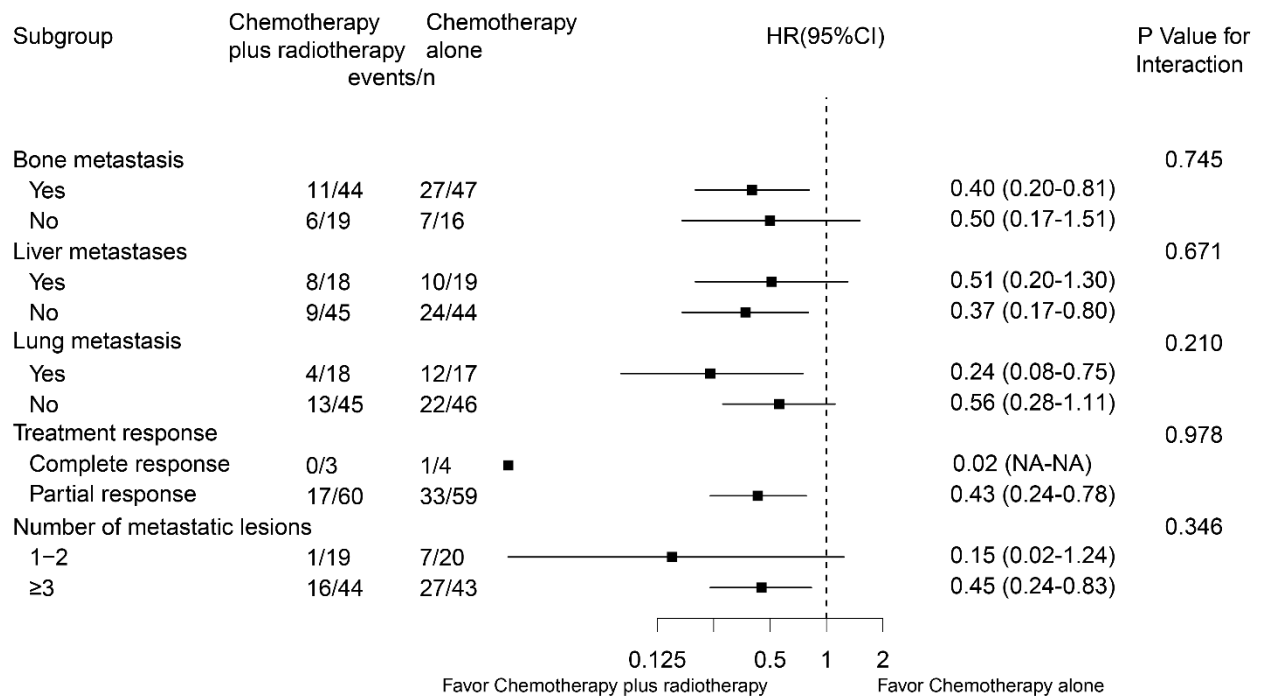

HR\*, hazard ratio, which were calculated using the Cox proportional hazards model.  
 CI, confidence interval. NR, not reached.

**Table S1.** Chemotherapy and local treatment in primary metastasized malignancies.

| Study                                    | Cancer type                         | Study design                             | Selection criteria | Treatment arms                                                  | Total number | Survival outcome                                            |
|------------------------------------------|-------------------------------------|------------------------------------------|--------------------|-----------------------------------------------------------------|--------------|-------------------------------------------------------------|
| Michisch et al (2001) <sup>[6]</sup>     | Renal cell cancer                   | Multicenter, prospective                 | All M1 patients    | Interferon alone vs Interferon+Nephrectomy                      | 84           | OS: 7 mo vs 17 mo (HR 0.54, 95%CI, 0.31-0.94; p = 0.03)     |
| Robert et al (2001) <sup>[7]</sup>       | Renal cell cancer                   | Multicenter, Prospective                 | All M1 patients    | Interferon Alone vs Interferon+Nephrectomy                      | 241          | OS: 8.1 mo vs 11.1 mo (p=0.012)                             |
| Gomez et al (2016) <sup>[8]</sup>        | Non-Small Cell Lung cancer          | Multicenter, Prospective                 | Oligo M1 patients  | Maintenance Therapy vs Local consolidative therapy              | 48           | PFS: 3.9 mo vs 11.9 mo (HR 0.35, 90%CI, 0.18-0.66 p=0.005)  |
| Thomas et al (2016) <sup>[9]</sup>       | Urothelial Carcinoma of the Bladder | National Cancer Data Base, Retrospective | All M1 patients    | Low Intensity Local Treatment vs High Intensity Local Treatment | 3747         | OS: 10.0 mo vs 14.9 mo (HR 0.56, 95%CI, 0.48-0.65, p<0.001) |
| David et al (2018) <sup>[10]</sup>       | All cancer                          | Multicenter, Prospective                 | Oligo M1 patients  | Palliate Treatment Alone vs Palliate Treatment+SABR             | 99           | OS: 28 mo vs 41 mo (HR 0.57, 95%CI, 0.30-1.10 p=0.09)       |
| Christopher et al (2018) <sup>[11]</sup> | Prostate cancer                     | Multicenter, Prospective                 | All M1 patients    | ADT alone vs ADT+radiotherapy                                   | 2061         | OS: 41.6 mo vs 42.5 mo (HR 0.92, 95%CI, 0.80-1.06, p=0.27)  |

OS, overall survival; PFS, progression-free survival; mo, months; HR, hazard ratio, which were calculated using the Cox proportional hazards model; ADT, androgen deprivation therapy; SABR, stereotactic ablative radiotherapy.



**Table S2.** Chemotherapy plus local radiotherapy in metastatic NPC.

| Study                                  | Study design                            | Selection criteria | Treatment arms                             | Total number | Survival outcome                                                                   |
|----------------------------------------|-----------------------------------------|--------------------|--------------------------------------------|--------------|------------------------------------------------------------------------------------|
| Rusthoven et al (2017) <sup>[12]</sup> | Multi-center registry,<br>Retrospective | All M1 patients    | Chemo Alone vs<br>Chemo+RT                 | 718          | OS: 15.5 mo vs<br>21.4 mo (Multivariate<br>HR 0.61, 95%CI, 0.51-<br>0.74, p<0.001) |
| Chen et al (2017) <sup>[13]</sup>      | Multi-center,<br>Retrospective          | All M1 patients    | Chemo Alone vs<br>Chemo + RT (70 Gy)       | 846          | OS: Multivariate HR<br>0.37, 95%CI, 0.29-0.47,<br>p<0.001                          |
| Lin H et al (2013) <sup>[14]</sup>     | Single center,<br>Retrospective         | All M1 patients    | Chemo Alone vs<br>Chemo + RT (68-72<br>Gy) | 226          | OS: 16 mo vs<br>36 mo (HR 0.34,<br>P<0.001)                                        |
| Chen et al (2013) <sup>[15]</sup>      | Single center ,<br>Retrospective        | All M1 patients    | Chemo Alone vs<br>Chemo+RT                 | 345          | OS: 26 mo vs<br>48 mo (HR 0.4, 95%CI,<br>0.3-0.5, p<0.001)                         |

OS, overall survival; PFS, progression-free survival; mo, months; HR, hazard ratio, which were calculated using the Cox proportional hazards model; chemo, chemotherapy; RT, radiotherapy.

**Table S3.** Distribution of patients by site of enrollment.

| <b>City</b> | <b>Institution</b>                                       | <b>Investigators</b> | <b>Number of randomized patients</b> |
|-------------|----------------------------------------------------------|----------------------|--------------------------------------|
| Guangzhou   | Sun Yat-sen University<br>Cancer Center                  | Ming-Yuan Chen       | 122                                  |
| Guangzhou   | Guangdong General<br>Hospital                            | Hong-Dan Zhang       | 2                                    |
| Guangzhou   | The First Affiliated Hospital,<br>Sun Yat-sen University | Bi-Xiu Wen           | 2                                    |

**Table S4.** Members of the Independent Data Monitoring Committee (IDMC).

| <b>Position</b> | <b>Name</b>     | <b>Job Title</b>                                                                                                                                         | <b>Specialty</b>         |
|-----------------|-----------------|----------------------------------------------------------------------------------------------------------------------------------------------------------|--------------------------|
| Chairman        | Yi-Min Liu      | Department of Radiotherapy<br>Oncology, Sun Yat-sen Memorial<br>Hospital, Sun Yat-sen<br>University/Professor                                            | Radiotherapy<br>Oncology |
| Member          | Wen Chen        | School of Public Health, Sun Yat-sen<br>University/Professor                                                                                             | Health Statistics        |
| Member          | Gang Li         | Department of Otorhinolaryngology,<br>Southern Medical University Nanfang<br>Hospital/Professor                                                          | Otorhinolaryngology      |
| Member          | Yi Pan          | Department of Radiotherapy<br>Oncology, Guangdong Provincial<br>People's Hospital/Professor                                                              | Radiotherapy<br>Oncology |
| Member          | Jing-Qi<br>Chen | The Ethics Committee and<br>Department of Medical Oncology of<br>the Second Affiliated Hospital of<br>Guangzhou Medical University<br>Chairman/Professor | Oncology                 |

**Table S5.** Members of the ethics committee of SYSUCC

| <b>Position</b>  | <b>Name</b>    | <b>Job Title</b>                                                   | <b>Specialty</b>      |
|------------------|----------------|--------------------------------------------------------------------|-----------------------|
| Chairman         | Wang-Qing Peng | Secretary of the Committee for Discipline Inspection               | Public Administration |
| Vice Chairman    | Li-Wu Fu       | Director of Experimental Research/Professor                        | Tumor Pharmacology    |
| Member           | Zhi-Yong Zhong | Member of the Residents Committee                                  | Public Administration |
| Member           | Wei-wei Cao    | Vice Director of the Central Office/Research Associate             | Public Administration |
| Member           | Yang Zhang     | Department of Medical Oncology/Physician                           | Clinical Medicine     |
| Member           | Hui-Ying Qin   | Director of the Nursing Department/Chief Nurse                     | Nursing               |
| Member           | Li Xu          | Hepatopancreatobiliary Surgery Department/Professor                | Surgical Oncology     |
| Member           | Xin-Xi Zhou    | Science and Education Division/Associate Researcher                | Oncology              |
| Member           | Meng-Bin Liu   | Director of Guangdong San Huan Hui Hua Law Office/Director, Lawyer | Law                   |
| Member           | Qiu-Yan Chen   | Department of Nasopharyngeal Carcinoma/Professor                   | Radiotherapy Oncology |
| Alternate Member | Hong Yang      | Department of Thoracic Surgery/Associate Professor                 | Surgical Oncology     |
| Alternate Member | Yong-Hong Li   | Department of Urological Surgery/Associate Professor               | Surgical Oncology     |
| Alternate Member | Yun-Peng Yang  | Department of Medical Oncology/Associate Professor                 | Medical Oncology      |
| Alternate Member | Ling-Long Tang | Department of Radiotherapy Oncology/Associate Professor            | Radiotherapy Oncology |

|                  |               |                                                         |                       |
|------------------|---------------|---------------------------------------------------------|-----------------------|
| Alternate Member | Yan-Xia Shi   | Department of Medical Oncology/Professor                | Medical Oncology      |
| Alternate Member | Yuan-Hong Gao | Department of Radiotherapy Oncology/Associate Professor | Radiotherapy Oncology |

**Table S6.** Treatment exposure in the intention-to-treat population.

|                                                                 | <b>Chemotherapy plus<br/>radiotherapy<br/>(N = 63)</b> | <b>Chemotherapy<br/>alone<br/>(N = 63)</b> |
|-----------------------------------------------------------------|--------------------------------------------------------|--------------------------------------------|
| <b>Cycles received†</b>                                         |                                                        |                                            |
| <b>4</b>                                                        | 1 (1.6%)                                               | 0 (0.0%)                                   |
| <b>5</b>                                                        | 0 (0.0%)                                               | 3 (4.8%)                                   |
| <b>6</b>                                                        | 62 (98.4%)                                             | 60 (95.2%)                                 |
| <b>Total</b>                                                    | 63 (100.0%)                                            | 63 (100.0%)                                |
| <b>Cumulative dose intensity for<br/>cisplatin, mg/m2</b>       |                                                        |                                            |
| <b>Median</b>                                                   | 560                                                    | 540                                        |
| <b>IQR</b>                                                      | 520–600                                                | 500–600                                    |
| <b>Cumulative dose intensity for 5-<br/>fluorouracil, mg/m2</b> |                                                        |                                            |
| <b>Median</b>                                                   | 5500                                                   | 5600                                       |
| <b>IQR</b>                                                      | 5000–6000                                              | 5000–6000                                  |
| <b>Patients who received definitive<br/>IMRT, no. (%)</b>       | 61 (96.8%)                                             | 1 (1.6%)                                   |
| <b>Patient who completed<br/>definitive IMRT, no. (%)</b>       | 59 (96.7%)                                             | 1 (100.0%)                                 |
| <b>Median (IQR) dose of IMRT (Gy)</b>                           | 70 (70 - 70)                                           | -----*                                     |
| <b>Median (IQR) dose per fraction<br/>(Gy)</b>                  | 2.19 (2.12-2.33)                                       | -----*                                     |
| <b>Median (IQR) duration of IMRT<br/>(days)</b>                 | 42 (40-49)                                             | -----*                                     |

Data are n(%) unless otherwise specified. ---† All patients received 3 cycles before randomization. \*There was only one patient who received IMRT in the chemotherapy alone group.

**Table S7.** Disease recurrence distribution in the two treatment groups.

|                                             | <b>Chemotherapy plus<br/>radiotherapy<br/>N = 63</b> | <b>Chemotherapy<br/>alone<br/>N = 63</b> |
|---------------------------------------------|------------------------------------------------------|------------------------------------------|
| <b>First site of disease<br/>recurrence</b> | 37 (58.7%)                                           | 56 (88.9%)                               |
| <b>Distant alone</b>                        | 27 (42.9%)                                           | 12 (19.0%)                               |
| <b>Local alone</b>                          | 1 (1.6%)                                             | 1 (1.6%)                                 |
| <b>Regional alone</b>                       | 2 (3.2%)                                             | 6 (9.5%)                                 |
| <b>Local+regional</b>                       | 0                                                    | 6 (9.5%)                                 |
| <b>Distant+local</b>                        | 1 (1.6%)                                             | 5 (7.9%)                                 |
| <b>Distant+regional</b>                     | 2 (3.2%)                                             | 12 (19.0%)                               |
| <b>Distant+local+regional</b>               | 4 (6.3%)                                             | 14 (22.2%)                               |
| <b>Distant metastatic<br/>recurrence</b>    | 34 (54.0%)                                           | 43 (68.3%)                               |
| <b>Bone</b>                                 | 13 (20.6%)                                           | 15 (23.8%)                               |
| <b>Lung</b>                                 | 8 (12.7%)                                            | 11 (17.5%)                               |
| <b>Liver</b>                                | 8 (12.7%)                                            | 11 (17.5%)                               |
| <b>Other</b>                                | 1 (1.6%)                                             | 0 (0.0%)                                 |
| <b>Multiple</b>                             | 4 (6.3%)                                             | 6 (9.5%)                                 |

Data are n(%) unless otherwise specified.

**Table S8.** Summary of subsequent therapies.

|                                                  | Chemotherapy<br>plus radiotherapy<br>N = 63 | Chemotherapy<br>alone<br>N = 63 |
|--------------------------------------------------|---------------------------------------------|---------------------------------|
| Subsequent chemotherapy                          |                                             |                                 |
| None                                             | 27 (42.9%)                                  | 22 (34.9%)                      |
| Gemcitabine plus cisplatin/carboplatin           | 25 (39.7%)                                  | 24 (38.1%)                      |
| Docetaxel plus cisplatin/carboplatin             | 10 (15.9%)                                  | 10 (15.9%)                      |
| Others                                           | 1 (1.6%)                                    | 7 (11.1%)                       |
| Time to subsequent chemotherapy, months          |                                             |                                 |
| Median                                           | 11.8                                        | 7.7                             |
| IQR                                              | 9.2 to 17.9                                 | 5.7 to 12.8                     |
| Locoregional radiotherapy                        | 0 (0.0%)                                    | 4 (6.3%)                        |
| Palliative treatment to the metastatic sites (%) |                                             |                                 |
| Bone                                             | 10 (15.9%)                                  | 9 (14.3%)                       |
| Lung                                             | 1 (1.6%)                                    | 0 (0.0%)                        |
| Liver                                            | 0 (0.0%)                                    | 1 (1.6%)                        |
| Other sites                                      | 1 (1.6%)                                    | 1 (1.6%)                        |

Data are n (%) unless otherwise specified. Other regimens included cisplatin plus fluorouracil and docetaxel, gemcitabine plus navelbine, gemcitabine plus docetaxel, and others.
