# Supplementary material
Source: PubMed Central journal article supplement (PMC7378870)
Supplement: jamaoncol-e201808-s003.pdf [file jamaoncol-e201808-s003.pdf]

## Data Sharing Statement

You. Efficacy and Safety of Locoregional Radiotherapy With Chemotherapy vs Chemotherapy Alone in De Novo Metastatic Nasopharyngeal Carcinoma. *JAMA Oncol*. Published July 23, 2020. 10.1001/jamaoncol.2020.1808

### Data

**Data available:** No

### Additional Information

**Explanation for why data not available:** Considering patients' privacy and related regulations in China, we chose not to make the database public to everyone. However, our raw database will be deposited on the Research Data Deposit public platform ([www.researchdata.org.cn](http://www.researchdata.org.cn)). If a researcher wants to use our raw data for scientific research purposes, he or she could apply for use with our corresponding author and database administrator.
